# Supplementary material for: Trends in mass spectrometry imaging for cardiovascular diseases
Source: PubMed Central journal article supplement (PMC6594994; doi:10.1007/s00216-019-01780-8), 2019-04-12
Supplement: 216_2019_1780_MOESM1_ESM.pdf [file 216_2019_1780_MOESM1_ESM.pdf]

## **Analytical and Bioanalytical Chemistry**

### **Electronic Supplementary Material**

#### **Trends in mass spectrometry imaging for cardiovascular diseases**

Stephanie T. P. Mezger, Alma M. A. Mingels, Otto Bekers, Berta Cillero-Pastor,  
Ron M. A. Heeren

**Table S1 Overview of MSI research on cardiovascular**

| tissue         | Species | Tissue                                                                                                                               | Sample preparation                                                  | Instrument and settings                                                                                                                              | Main results                                                                                                                                                                                                                                                         | Histology             | Ref*       |
|----------------|---------|--------------------------------------------------------------------------------------------------------------------------------------|---------------------------------------------------------------------|------------------------------------------------------------------------------------------------------------------------------------------------------|----------------------------------------------------------------------------------------------------------------------------------------------------------------------------------------------------------------------------------------------------------------------|-----------------------|------------|
| Lipid<br>MALDI | Rat     | Healthy heart                                                                                                                        | Frozen<br>Washes<br>DHB, sublimation                                | Autoflex III MALDI-TOF/TOF, Bruker Daltonics<br>Lateral resolution: 100µm<br>Negative ionization mode                                                | Ventricular myocardium: CL ( <i>m/z</i> 1447.97)                                                                                                                                                                                                                     | H&E                   | [1]        |
|                | Rat     | Healthy heart                                                                                                                        | Frozen<br>AgNPs implantation                                        | MALDI LTQ-XL Orbitrap, Thermo Fisher<br>Lateral resolution: 50µm<br>Positive ionization mode: 600-1100 Da, Negative ionization mode: 600-1700 Da     | Vessels region: TAG (+) and PI (-) species<br>Myocardium: PC (+), PE (+&-) and CL (-) species and fragments                                                                                                                                                          | n/a                   | [2]        |
|                | Mouse   | Healthy heart                                                                                                                        | Frozen<br>DHB, sublimation                                          | MALDI TOF (homebuilt)<br>Lateral resolution: 9.6µm<br>Positive ionization mode                                                                       | Hinge: <i>m/z</i> 600<br>Hinge and valve cups: <i>m/z</i> 741, 846                                                                                                                                                                                                   | H&E                   | [3]        |
|                | Rat     | LAD ligation model; heart                                                                                                            | Frozen<br>DHB with(out) NaOAc, nebulizer                            | MALDI LTQ-XL Linear ion trap, Thermo Scientific<br>Lateral resolution: 100µm<br>Positive ionization mode, <i>m/z</i> 100-250 and <i>m/z</i> 200-2000 | Infarcted region: lysoPL<br>Perfused region: Intact PL, creatine ( <i>m/z</i> 132)                                                                                                                                                                                   | TTC                   | [4]        |
|                | Ovine   | Healthy adult aortic valves                                                                                                          | Frozen<br>Washes<br>DHB, sublimation                                | UltrafleXtreme MALDI TOF/TOF, Bruker Daltonics<br>Lateral resolution: 25µm<br>Positive ionization mode, <i>m/z</i> 450-1800                          | Differentiate fibrosa and spongiosa: PC(12:0/16:0) <i>m/z</i> 678.5, SM(d18:1/18:0) <i>m/z</i> 731.7, PC(16:0/16:0) <i>m/z</i> 732.6, PE(18:1/20:1) <i>m/z</i> 774.7, PC(18:0/22:5) <i>m/z</i> 836.7                                                                 | VVG                   | [5]        |
|                |         | Healthy pre-natal aortic valves                                                                                                      |                                                                     |                                                                                                                                                      |                                                                                                                                                                                                                                                                      |                       |            |
|                | Human   | Aortic valve – pediatric donor tissue 0 to 14 years of age – healthy or diseased                                                     | OCT – frozen<br>Washes<br>DHB, sublimation                          | Apex-9.4-Qe FTICR, Bruker Daltonics<br>Spatial resolution: 20µm<br>Positive ionization mode, <i>m/z</i> 450-1600                                     | Fibrosa: SM(16:0) <i>m/z</i> 703.6<br>Spongiosa: SM(18:0) <i>m/z</i> 731.6                                                                                                                                                                                           | H&E                   |            |
|                | Mouse   | ApoE <sup>-/-</sup> - high cholesterol diet – orally dosed with stable isotope labelled cholesterol<br>Atherosclerotic aortic tissue | OCT – frozen<br>DHB, sublimation or CHCA, acoustic droplet ejection | QTOF MALDI Synapt G2 HDMS, Waters Corporation<br>Spatial resolution: 50µm<br>Positive ionization mode, <i>m/z</i> 50-950                             | Plaque and necrotic core: Free cholesterol ( <i>m/z</i> 369.3514)<br>Heart tissue: CE ( <i>m/z</i> 649.5944)<br>Lesion arterial wall and atheroma: LPC species ( <i>m/z</i> 496.3394, 524.3699, 522.3538)<br>Homogeneous: PC ( <i>m/z</i> 758.5677) → Lp-LPA2 action | H&E                   | [6]        |
|                | Rabbit  | Atherosclerosis model - aortic section                                                                                               | Frozen<br>DHB, sprayed                                              | UltrafleXtreme MALDI-TOF, Bruker Daltonics<br>Spatial resolution: 30µm<br>Dual polarity, 500-1200 Da                                                 | Calcified region: PA, SM, and PE-Cer species<br>Increased in intima: SFA, SM, PI, PF, and lysolipid species                                                                                                                                                          | H&E, AR<br>ORO<br>IHC | [7]<br>[8] |
|                | Mouse   | ApoE <sup>-/-</sup> , aortic sinuses                                                                                                 | OCT<br>DAN, sublimation or Silver sputtering                        | UltrafleXtreme MALDI-TOF/TOF, Bruker Daltonics<br>Spatial resolution: DAN dual polarity, 40µm - Silver-assisted LDI, 30µm                            | Bulk of plaque: LPC (example: <i>m/z</i> 496.3)<br>Plaque: Interior wall - PC species (example: <i>m/z</i> 804.5, 832.5), Cholesterol rich regions<br>Aortic valve cusps: TAG species                                                                                | ORO                   | [9]        |
|                | Human   | Atherosclerotic carotid artery                                                                                                       | Frozen - OCT<br>DAN, sublimation or Silver sputtering               | UltrafleXtreme MALDI-TOF/TOF, Bruker Daltonics<br>Spatial resolution: DAN dual polarity, 100µm - Silver-assisted LDI, 100µm                          | Plaque: LPC species and ceramide species ( <i>m/z</i> 616.4, 687.6, and 685.6)                                                                                                                                                                                       | H&E                   |            |
|                | Mouse   | ApoE <sup>-/-</sup> , atherosclerotic aortic roots                                                                                   | Paraformaldehyde, CMC<br>DHB, airbrush                              | Ultraflex II MALDI TOF/TOF, Bruker Daltonics<br>Lateral resolution: 25µm<br>Positive ionization mode, <i>m/z</i> 400-1000                            | Lipid rich: CE species ( <i>m/z</i> 671.6, 673.6)<br>Smooth muscle cells: PC species ( <i>m/z</i> 804.5, 832.5)<br>Calcified region: <i>m/z</i> 566.9                                                                                                                | H&E,<br>ORO<br>IHC    | [10]       |
|                | Human   | Atherosclerotic femoral artery                                                                                                       | Frozen<br>DHB, airbrush                                             | Ultraflex II MALDI TOF/TOF, Bruker Daltonics<br>Lateral resolution: 50µm<br>Positive ionization mode, <i>m/z</i> 400-1000                            | Lipid rich: CE ( <i>m/z</i> 671.6, 673.6) and TAG species ( <i>m/z</i> 907.7)<br>Smooth muscle cells: PC species ( <i>m/z</i> 804.5, 832.5)<br>Calcified region: <i>m/z</i> 539.0                                                                                    |                       |            |
|                | Mouse   | ApoE <sup>-/-</sup> , aortic sample                                                                                                  | Frozen                                                              | Ultraflex II MALDI TOF/TOF, Bruker Daltonics                                                                                                         | Atherosclerotic tissue: increase LPC and decrease                                                                                                                                                                                                                    | H&E,                  | [11]       |

|       |      |       |                                                                  |                                             |                                                                                                                                                                                                                                         |                                                                                                                                                                                                                                                                                                                                                                                                                                                                                                   |                                |      |
|-------|------|-------|------------------------------------------------------------------|---------------------------------------------|-----------------------------------------------------------------------------------------------------------------------------------------------------------------------------------------------------------------------------------------|---------------------------------------------------------------------------------------------------------------------------------------------------------------------------------------------------------------------------------------------------------------------------------------------------------------------------------------------------------------------------------------------------------------------------------------------------------------------------------------------------|--------------------------------|------|
|       |      | Human | Atherosclerotic femoral artery                                   | DHB, airbrush                               | Lateral resolution: 50µm<br>Positive ionization mode, <i>m/z</i> 400-1000                                                                                                                                                               | arachidonyl-PC<br>Arachidonyl-PC region: increase LPCAT3 expression                                                                                                                                                                                                                                                                                                                                                                                                                               | EVG<br>IHC                     |      |
| LIPID | SIMS | Mouse | Healthy heart                                                    | OCT - frozen                                | LA (New wave, Fremont, US) coupled to ICPMS (quadrupole, XSeries2), Thermo Fischer Scientific<br>Spatial resolution: 160µm<br>TOF SIMS IV, IONTOF GmbH - Bismuth liquid metal ion gun<br>Lateral resolution: 33µm, <i>m/z</i> up to 800 | Right ventricle: higher Zn, Mn, Cu, Mg, and Ca<br>Aorta: higher Fe<br>Endocardium: choline and its fragment ( <i>m/z</i> 104.21, 84.12), cholesterol fragment ( <i>m/z</i> 146.97)                                                                                                                                                                                                                                                                                                                | H&E                            | [12] |
|       |      | Rat   | Healthy aorta                                                    | Frozen, freeze-fracture, free-dried         | TOF SIMS IV & V, IONTOF GmbH<br>Bismuth liquid metal ion gun<br>Ion beam focus: 300nm                                                                                                                                                   | Intima and media (between lamellae): choline headgroup ( <i>m/z</i> 184); Media (lamellae region): potassium, cholesterol ( <i>m/z</i> 369, 385)                                                                                                                                                                                                                                                                                                                                                  | Toluidine blue/azan            | [13] |
|       |      | Human | Atherosclerotic plaque                                           | Frozen                                      | Dual polarity                                                                                                                                                                                                                           | Intima: cholesterol (spots), PC and SM species<br>Media: PC and DAG species                                                                                                                                                                                                                                                                                                                                                                                                                       | n/a                            |      |
|       |      | Rat   | Healthy heart                                                    | Frozen<br>Metallization: gold sputtered     | TOF SIMS TRIFT II, Physical Electronics,<br>Gold liquid metal ion gun<br>Positive ionization mode, <i>m/z</i> up to 1500                                                                                                                | Aorta wall ( <i>m/z</i> 667 and 840), Pericardium ( <i>m/z</i> 334), Ventricles ( <i>m/z</i> 175 and 213)<br>Aorta wall, semilunar valve, endocardium: <i>m/z</i> 83<br>Pulmonary artery, right atrium, atrioventricular valve: <i>m/z</i> 145; Atria, aorta wall, atrioventricular valves, coronary artery: cholesterol ( <i>m/z</i> 369, 385); Atria, aortic wall, aorta valve: <i>m/z</i> 86; Atria, aorta, pulmonary artery, atrioventricular and semilunar valves: choline ( <i>m/z</i> 104) | H&E                            | [14] |
|       |      | Mouse | Healthy heart                                                    |                                             |                                                                                                                                                                                                                                         | Mouse similar patterns as rat                                                                                                                                                                                                                                                                                                                                                                                                                                                                     |                                |      |
|       |      | Human | Ventricle from failing left-ventricular free-wall heart explants |                                             |                                                                                                                                                                                                                                         | Myocardium: cholesterol choline ( <i>m/z</i> 369), choline ( <i>m/z</i> 104); Endocardium: choline ( <i>m/z</i> 104); Pericardium: DAG species ( <i>m/z</i> 549, 557) and ceramide ( <i>m/z</i> 604)                                                                                                                                                                                                                                                                                              | H&E<br>Sirius Red<br>Trichrome |      |
|       |      | Mouse | LDLr <sup>-/-</sup> model; Atherosclerotic carotid artery        | Gelatin – Frozen                            | TOF-SIMS TRIFT II, Physical Electronics<br>Gold liquid metal ion gun<br>Dual polarity                                                                                                                                                   | Necrotic core: LPA species, cholesterol, phosphatidic acids, triglycerides                                                                                                                                                                                                                                                                                                                                                                                                                        | H&E<br>IHC                     | [15] |
|       |      | Rat   | Healthy heart                                                    | Frozen<br>Silicon substrate                 | TOF SIMS IV, IONTOF, Gold liquid metal ion gun<br>Lateral resolution: ~3.9µm<br>Dual polarity                                                                                                                                           | Complementary distribution of PL and CL species, 16 and 18-C FA species                                                                                                                                                                                                                                                                                                                                                                                                                           | n/a                            | [16] |
|       |      |       | Healthy left ventricular cells                                   | Isolated cells<br>25µl on silicon substrate | TOF SIMS IV, IONTOF, Gold liquid metal ion gun<br>Lateral resolution: ~430nm<br>Positive ionization mode                                                                                                                                | Cell membrane: phospholipids and cholesterol species                                                                                                                                                                                                                                                                                                                                                                                                                                              |                                |      |
|       |      | Human | Atherosclerotic carotid artery                                   | Frozen                                      | TOF-SIMS IV, IONTOF, Bismuth cluster ion source<br>Spatial resolution: 1-2µm<br>Dual polarity, <i>m/z</i> 1-1000                                                                                                                        | Inner border: cholesterol ( <i>m/z</i> 385), phosphatidic acids ( <i>m/z</i> 650-750) and SM fragments ( <i>m/z</i> 616, 642)<br>Surrounding and thrombus: vitamin E ( <i>m/z</i> 430)<br>Intima: PI fragments                                                                                                                                                                                                                                                                                    | Masson<br>Trichrome            | [17] |
| LIPID | DESI | Human | Atherosclerotic carotid artery                                   | Frozen<br>CMC for sectioning                | DESI stage (lab built) coupled to LTQ (Thermo Scientific) - Normal & Reactive DESI<br>Spatial resolution: 200µm<br>Positive ionization mode, <i>m/z</i> 150-1200                                                                        | Plaque: SM and PC species, and cholesterol<br>Lipid core: CE species surrounded by cholesterol, PC, and SM                                                                                                                                                                                                                                                                                                                                                                                        | H&E                            | [18] |
|       |      | Mouse | LAD ligation model; heart                                        | Frozen                                      | DESI stage (custom built) LTQ-Orbitrap XL (Thermo Fisher Scientific)<br>Lateral resolution: 0,2mm<br>Negative ionization mode, <i>m/z</i> 50-1200                                                                                       | Infarcted tissue: FA(18:1) <i>m/z</i> 281.248, FA(18:0) <i>m/z</i> 283.264, FA(16:1) <i>m/z</i> 253.217, and FA(16:0) <i>m/z</i> 255.232<br>Perfused tissue: glycerophospholipid species, polyunsaturated FAs, and taurine ( <i>m/z</i> 124.007)<br>GBDT algorithm: 62 peaks for classification                                                                                                                                                                                                   | H&E                            | [19] |

|                 |       |                |                                                                          |                                                                                |                                                                                                                                                               |                                                                                                                                                                                                                                                                                                                                                                                                                                                                                                                           |                    |            |
|-----------------|-------|----------------|--------------------------------------------------------------------------|--------------------------------------------------------------------------------|---------------------------------------------------------------------------------------------------------------------------------------------------------------|---------------------------------------------------------------------------------------------------------------------------------------------------------------------------------------------------------------------------------------------------------------------------------------------------------------------------------------------------------------------------------------------------------------------------------------------------------------------------------------------------------------------------|--------------------|------------|
|                 |       | Human          | Vascular graft                                                           | Frozen                                                                         | DESI source (OMNISpray) AmaZon ETD (Bruker Daltonics) - Normal & Reactive DESI Dual polarity, <i>m/z</i> 300-1200                                             | Graft: SM, PC species and cholesterol. Graft Wall: SM (24:1), Biofilm on graft wall: PS (38:4), Plaque: cholesterol                                                                                                                                                                                                                                                                                                                                                                                                       | n/a                | [20]       |
| Peptide/protein | MALDI | Chicken        | Healthy heart                                                            | Fixation - Embedding<br>Dewaxing<br>Washes<br>DHB, CHCA or SA, nebulizer       | Autoflex III MALDI TOF/TOF, Bruker Daltonics, Linear mode<br>Lateral resolution: 75-100µm<br>Positive ionization mode, <i>m/z</i> 3000-30000                  | Myocardium ( <i>m/z</i> 9492, 11862), Myocardium right ventricle ( <i>m/z</i> 6614), Atrial myocardium ( <i>m/z</i> 6643)<br>Outer ventricular wall ( <i>m/z</i> 6643), Walls major heart vessels layers ( <i>m/z</i> 7475, 6143, and 11862)<br>Aortic valvular tissue ( <i>m/z</i> 5308,) Aortic intimal and adventitial tissue ( <i>m/z</i> 5935)<br>Apex interventricular septum ( <i>m/z</i> 6669), Bundle of His ( <i>m/z</i> 9329), Valve structures ( <i>m/z</i> 12209), Leaflets left AV valve ( <i>m/z</i> 3915) | n/a                | [21]       |
|                 |       | Mouse          | LAD ligation model; heart                                                | Frozen<br>ANG II                                                               | Autoflex III MALDI TOF/TOF, Bruker Daltonics                                                                                                                  | Infarct area: ANG III ( <i>m/z</i> 931) and ANG-(2-7) ( <i>m/z</i> 784)<br>Increase of APA in MI tissue                                                                                                                                                                                                                                                                                                                                                                                                                   | TTC                | [22]       |
|                 |       | Mouse          | LAD ligation model; heart                                                | Frozen<br>Washes<br>Intact: SA, TM sprayer<br>Peptide: trypsin, SA, TM sprayer | Autoflex Speed MALDI-TOF/TOF, Bruker Daltonics<br>Spatial distribution: 100µm<br>Positive ionization mode<br>Intact: linear mode<br>Peptides: reflectron mode | Healthy cardiac tissue: creatine ( <i>m/z</i> 132)<br>Remote: altered enzymatic activity<br>Border: high transcription and translation Infarcted: mitochondrial and metabolic enzymes                                                                                                                                                                                                                                                                                                                                     | H&E                | [23]       |
|                 |       |                | Healthy heart                                                            |                                                                                |                                                                                                                                                               | Healthy cardiac tissue: <i>m/z</i> 908, 1632.96, 2816.25, and 4497.11 (Ephrin A1 peptides)                                                                                                                                                                                                                                                                                                                                                                                                                                |                    |            |
|                 |       | Mouse<br>Human | MI heart samples                                                         | FFPE<br>Pre-treatment buffer<br>Trypsin, DHB, chemical inkjet printer          | MALDI TOF/TOF (AXIMA Performance and 7090 series; Shimadzu)<br>Positive ionization mode, <i>m/z</i> 700-3000                                                  | Endocardium: Haemoglobin subunit α ( <i>m/z</i> 1529.997)<br>Infarcted region: MYH6, MYL3, ATP5A, MYH7, and ACTA2 ( <i>m/z</i> 1084.64, 1396.96, 1625.09, 1741.12, and 1956.24, respectively)                                                                                                                                                                                                                                                                                                                             | H&E<br>PTAH<br>IHC | [24]       |
|                 |       | Rabbit         | Atherosclerosis model - aortic section                                   | Frozen<br>Washes<br>SA, sprayed                                                | UltrafleXtreme MALDI-TOF, Bruker Daltonics<br>Spatial resolution: 30µm<br>Linear positive, 2000-20000 kDa                                                     | TMSB4X ( <i>m/z</i> 4762) upregulated                                                                                                                                                                                                                                                                                                                                                                                                                                                                                     | IHC                | [7]<br>[8] |
|                 |       | Human          | Heart valve with moderate CAS                                            | Frozen<br>Carnoy procedure<br>SA, sprayed                                      | Autoflex III smartbeam MALDI-TOF/TOF, Bruker Daltonics<br>Spatial resolution: 75µm<br>Positive ionization mode, 1000-30000Da                                  | Calcified area (5059 Da), Collagen-rich (4300 Da), Elastic fibers-rich (13984 Da), Surrounding tissue (14659 Da), Margins calcified area: NDRG-2 (peptide, 3398 Da), Around calcified lesion: CO6A3 (peptide, 4321 Da)                                                                                                                                                                                                                                                                                                    | VVG<br>ORO<br>IHC  | [25]       |
|                 |       | Human          | Left atrial appendage specimens<br>Atrial fibrillation (PX, PE, and LSP) | FFPE<br>Dewaxing, Washes, Antigen retrieval<br>Trypsin, CHCA, Image Prep       | Autoflex III MALDI TOF/TOF, Bruker Daltonics<br>Lateral resolution: 80µm<br>Positive ionization mode, <i>m/z</i> 800-3500                                     | Decreased in PX: ATPA ( <i>m/z</i> 1000.489), MYL4 ( <i>m/z</i> 1262.601), H13 ( <i>m/z</i> 1260.618), AHNK ( <i>m/z</i> 901.472), CDH13 ( <i>m/z</i> 1564.840), VIM ( <i>m/z</i> 1093.555)<br>Increased in LSP and PE: CO1A1 ( <i>m/z</i> 837.393)                                                                                                                                                                                                                                                                       | IHC                | [26]       |
| Metabolites     | MALDI | Mouse          | LAD ligation model; heart<br>13C labelled glucose & lactate injection    | FMW fixation<br>Super cryo embedding medium<br>9AA, manual spray coated        | UltrafleXtreme MALDI TOF, Bruker Daltonics<br>Lateral resolution: 100µm<br>Negative ionization mode, <i>m/z</i> 50-1000                                       | Ischemic core: increase NADH, lactate, succinate, <sup>13</sup> C <sub>3</sub> -glutamate; Non-ischemic region adjacent to core: ATP, ADP; More distant region: higher lactate/pyruvate ratio                                                                                                                                                                                                                                                                                                                             | n/a                | [27]       |
|                 |       | Mouse          | C3H mice<br>- injected with CVB3 virus (VM hearts)<br>- control          | Frozen<br>9AA, Suncollect                                                      | QTOF MALDI SYNAPT HDMS G2Si, Waters<br>Lateral resolution: 100µm<br>Negative ionization mode                                                                  | VM hearts vs control: decrease ATP, ADP, AMP, total adenine nucleotide, NAD<br>Increase UDP-GlcNAc, PI, AA, cardiolipin                                                                                                                                                                                                                                                                                                                                                                                                   | H&E                | [28]       |

\* Reference as listed below. Not equal to the main manuscript

Reflectron mode unless stated otherwise, +: positive ionization mode, -: negative ionization mode

AR: Alizarin Red, EVG: Elastica van Gieson, H&E: Haematoxylin and eosin, IHC: Immunohistochemistry, ORO: Oil Red O, PTAH: Phosphotungstic acid-haematoxylin,

TTC: 2,3,5-triphenyltetrazolium chloride, VVG: Verhoeff-Van Gieson

## References

1. Wang HY, Wu HW, Tsai PJ, Liu CB, Zheng ZF. Matrix-assisted laser desorption/ionization mass spectrometry imaging of cardiolipins in rat organ sections. *Anal Bioanal Chem.* 2014;406(2):565-75. doi:10.1007/s00216-013-7492-y.
2. Jackson SN, Baldwin K, Muller L, Womack VM, Schultz JA, Balaban C et al. Imaging of lipids in rat heart by MALDI-MS with silver nanoparticles. *Anal Bioanal Chem.* 2014;406(5):1377-86. doi:10.1007/s00216-013-7525-6.
3. Chaurand P, Cornett DS, Angel PM, Caprioli RM. From whole-body sections down to cellular level, multiscale imaging of phospholipids by MALDI mass spectrometry. *Mol Cell Proteomics.* 2011;10(2):O110004259. doi:10.1074/mcp.O110.004259.
4. Menger RF, Stutts WL, Anbukumar DS, Bowden JA, Ford DA, Yost RA. MALDI mass spectrometric imaging of cardiac tissue following myocardial infarction in a rat coronary artery ligation model. *Anal Chem.* 2012;84(2):1117-25. doi:10.1021/ac202779h.
5. Angel PM, Bayoumi AS, Hinton RB, Ru Su Y, Bichell D, Mayer JE et al. MALDI Imaging Mass Spectrometry as a Lipidomic Approach to Heart Valve Research. *J Heart Valve Dis.* 2016;25(2):240-52.
6. Castro-Perez J, Hatcher N, Kofi Karikari N, Wang SP, Mendoza V, Shion H et al. In vivo isotopically labeled atherosclerotic aorta plaques in ApoE KO mice and molecular profiling by matrix-assisted laser desorption/ionization mass spectrometric imaging. *Rapid Commun Mass Spectrom.* 2014;28(22):2471-9. doi:10.1002/rcm.7039.
7. Martin-Lorenzo M, Balluff B, Maroto AS, Carreira RJ, van Zeijl RJ, Gonzalez-Calero L et al. Molecular anatomy of ascending aorta in atherosclerosis by MS Imaging: Specific lipid and protein patterns reflect pathology. *J Proteomics.* 2015;126:245-51. doi:10.1016/j.jprot.2015.06.005.
8. Martin-Lorenzo M, Balluff B, Maroto AS, Carreira RJ, van Zeijl RJ, Gonzalez-Calero L et al. Lipid and protein maps defining arterial layers in atherosclerotic aorta. *Data Brief.* 2015;4:328-31. doi:10.1016/j.dib.2015.06.005.
9. Patterson NH, Doonan RJ, Daskalopoulou SS, Dufresne M, Lenglet S, Montecucco F et al. Three-dimensional imaging MS of lipids in atherosclerotic plaques: Open-source methods for reconstruction and analysis. *Proteomics.* 2016;16(11-12):1642-51. doi:10.1002/pmic.201500490.
10. Zaima N, Sasaki T, Tanaka H, Cheng XW, Onoue K, Hayasaka T et al. Imaging mass spectrometry-based histopathologic examination of atherosclerotic lesions. *Atherosclerosis.* 2011;217(2):427-32. doi:10.1016/j.atherosclerosis.2011.03.044.
11. Tanaka H, Zaima N, Sasaki T, Yamamoto N, Inuzuka K, Yata T et al. Lysophosphatidylcholine Acyltransferase-3 Expression Is Associated with Atherosclerosis Progression. *J Vasc Res.* 2017;54(4):200-8. doi:10.1159/000473879.
12. Becker JS, Breuer U, Hsieh HF, Osterholt T, Kumtabtim U, Wu B et al. Bioimaging of metals and biomolecules in mouse heart by laser ablation inductively coupled plasma mass spectrometry and secondary ion mass spectrometry. *Anal Chem.* 2010;82(22):9528-33. doi:10.1021/ac102256q.
13. Malmberg P, Borner K, Chen Y, Friberg P, Hagenhoff B, Mansson JE et al. Localization of lipids in the aortic wall with imaging TOF-SIMS. *Biochim Biophys Acta.* 2007;1771(2):185-95. doi:10.1016/j.bbalip.2006.12.003.
14. Fornai L, Angelini A, Klinkert I, Giskes F, Kiss A, Eijkel G et al. Three-dimensional molecular reconstruction of rat heart with mass spectrometry imaging. *Anal Bioanal Chem.* 2012;404(10):2927-38. doi:10.1007/s00216-012-6451-3.
15. Bot M, de Jager SC, MacAleese L, Lagraauw HM, van Berkel TJ, Quax PH et al. Lysophosphatidic acid triggers mast cell-driven atherosclerotic plaque destabilization by increasing vascular inflammation. *J Lipid Res.* 2013;54(5):1265-74. doi:10.1194/jlr.M032862.
16. Jerigova M, Biro C, Kirchnerova J, Chorvatova A, Chorvat D, Jr., Lorenc D et al. Chemical imaging of cardiac cell and tissue by using secondary ion mass spectrometry. *Mol Imaging Biol.* 2011;13(6):1067-76. doi:10.1007/s11307-010-0460-4.
17. Mas S, Touboul D, Brunelle A, Aragoncillo P, Egido J, Laprevote O et al. Lipid cartography of atherosclerotic plaque by cluster-TOF-SIMS imaging. *Analyst.* 2007;132(1):24-6. doi:10.1039/b614619h.

18. Manicke NE, Nefliu M, Wu C, Woods JW, Reiser V, Hendrickson RC et al. Imaging of lipids in atheroma by desorption electrospray ionization mass spectrometry. *Anal Chem.* 2009;81(21):8702-7. doi:10.1021/ac901739s.
19. Margulis K, Zhou Z, Fang Q, Sievers RE, Lee RJ, Zare RN. Combining Desorption Electrospray Ionization Mass Spectrometry Imaging and Machine Learning for Molecular Recognition of Myocardial Infarction. *Anal Chem.* 2018. doi:10.1021/acs.analchem.8b03410.
20. Bodzon-Kulakowska A, Drabik A, Mystkowska J, Chlabicz M, Gacko M, Dabrowski JR et al. Desorption electrospray ionization-based imaging of interaction between vascular graft and human body. *J Biomed Mater Res B Appl Biomater.* 2016;104(1):192-6. doi:10.1002/jbm.b.33385.
21. Grey AC, Gelasco AK, Section J, Moreno-Rodriguez RA, Krug EL, Schey KL. Molecular morphology of the chick heart visualized by MALDI imaging mass spectrometry. *Anat Rec (Hoboken).* 2010;293(5):821-8. doi:10.1002/ar.21103.
22. Alghamri MS, Morris M, Meszaros JG, Elased KM, Grobe N. Novel role of aminopeptidase-A in angiotensin-(1-7) metabolism post myocardial infarction. *Am J Physiol Heart Circ Physiol.* 2014;306(7):H1032-40. doi:10.1152/ajpheart.00911.2013.
23. Lefcoski S, Kew K, Reece S, Torres MJ, Parks J, Reece S et al. Anatomical-Molecular Distribution of EphrinA1 in Infarcted Mouse Heart Using MALDI Mass Spectrometry Imaging. *J Am Soc Mass Spectrom.* 2018;29(3):527-34. doi:10.1007/s13361-017-1869-7.
24. Yajima Y, Hiratsuka T, Kakimoto Y, Ogawa S, Shima K, Yamazaki Y et al. Region of Interest analysis using mass spectrometry imaging of mitochondrial and sarcomeric proteins in acute cardiac infarction tissue. *Sci Rep.* 2018;8(1):7493. doi:10.1038/s41598-018-25817-7.
25. Mourino-Alvarez L, Iloro I, de la Cuesta F, Azkargorta M, Sastre-Oliva T, Escobes I et al. MALDI-Imaging Mass Spectrometry: a step forward in the anatomopathological characterization of stenotic aortic valve tissue. *Sci Rep.* 2016;6:27106. doi:10.1038/srep27106.
26. Klein O, Hanke T, Nebrich G, Yan J, Schubert B, Giavalisco P et al. Imaging Mass Spectrometry for Characterization of Atrial Fibrillation Subtypes. *Proteomics Clin Appl.* 2018:e1700155. doi:10.1002/prca.201700155.
27. Sugiura Y, Katsumata Y, Sano M, Honda K, Kajimura M, Fukuda K et al. Visualization of in vivo metabolic flows reveals accelerated utilization of glucose and lactate in penumbra of ischemic heart. *Sci Rep.* 2016;6:32361. doi:10.1038/srep32361.
28. Remels AHV, Derks WJA, Cillero-Pastor B, Verhees KJP, Kelders MC, Heggermont W et al. NF-kappaB-mediated metabolic remodelling in the inflamed heart in acute viral myocarditis. *Biochim Biophys Acta.* 2018;1864(8):2579-89. doi:10.1016/j.bbadis.2018.04.022.
